# Supplementary material for: Technical note: Evaluation of a low-cost evaporation protection method for portable water samplers
Source: Copernicus journal article supplement (doi:10.5194/hess-24-5821-2020), 2020-12-08
Supplement: Supplementary file 1 [file hess-24-5821-2020-supplement.zip]

Archive with 3 entries (3 files):
- Data.zip
- hess-24-5821-2020-supplement-title-page.pdf
- Supplement.pdf
