# Supplementary material for: Technical note: Evaluation of a low-cost evaporation protection method for portable water samplers
Source: Copernicus journal article supplement (doi:10.5194/hess-24-5821-2020), 2020-12-08
Supplement: Supplementary file 1 [file hess-24-5821-2020-supplement.zip › hess-24-5821-2020-supplement-title-page.pdf]

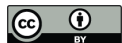

## *Supplement of*

# **Technical note: Evaluation of a low-cost evaporation protection method for portable water samplers**

**Jana von Freyberg et al.**

*Correspondence to:* Jana von Freyberg ([jana.vonfreyberg@epfl.ch](mailto:jana.vonfreyberg@epfl.ch)) and Julia L. A. Knapp ([julia.l.knapp@durham.ac.uk](mailto:julia.l.knapp@durham.ac.uk))

- [hess-24-5821-2020-supplement-title-page.pdf](#)
- [Data.zip](#)
- [Supplement.pdf](#)

The copyright of individual parts of the supplement might differ from the CC BY 4.0 License.
